# Supplementary material for: Enhanced Ambient Stability of Efficient Perovskite Solar Cells by Employing a Modified Fullerene Cathode Interlayer
Source: PubMed Central journal article supplement (PMC5039977; doi:10.1002/advs.201600027), 2016-03-22
Supplement: ADVS-3-0a-s001.pdf [file ADVS-3-0a-s001.pdf]

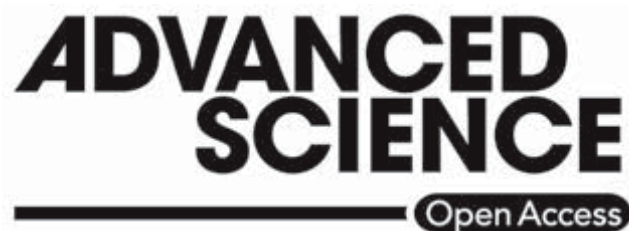

## Supporting Information

for *Adv. Sci.*, DOI: 10.1002/advs.201600027

Enhanced Ambient Stability of Efficient Perovskite Solar Cells by Employing a Modified Fullerene Cathode Interlayer

*Zonglong Zhu, Chu-Chen Chueh, Francis Lin, and Alex K.-Y. Jen\**

Supporting Information

## Enhanced Ambient Stability of Efficient Perovskite Solar Cells by Employing a Novel Fullerene Cathode Interlayer

Zonglong Zhu<sup>1</sup>, Chu-Chen Chueh<sup>1</sup>, Francis Lin<sup>2</sup>, Alex K.-Y. Jen<sup>1,2\*</sup>

<sup>1</sup>Department of Materials Science and Engineering, <sup>2</sup>Department of Chemistry, University of Washington, Seattle, WA 98195, USA

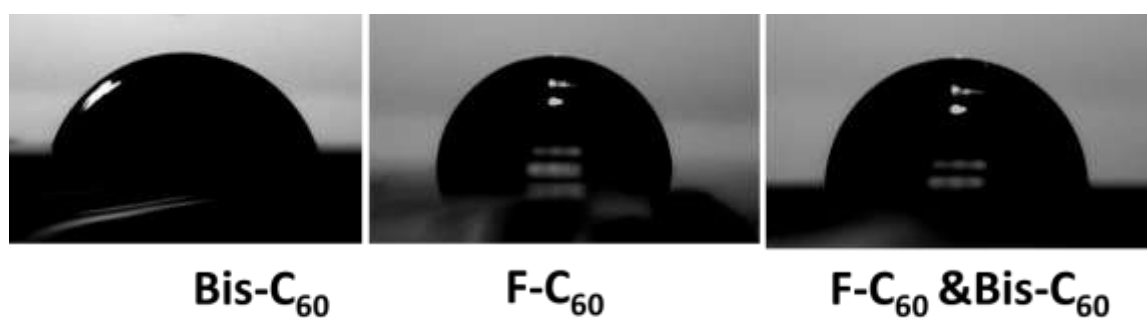

**Figure S1.** Contact angle measurement of bis-C<sub>60</sub>, F-C<sub>60</sub> and hybrid surfactant (bis-C<sub>60</sub> & F-C<sub>60</sub>), wherein the contact angle is 68° for bis-C<sub>60</sub>, 96° for F-C<sub>60</sub>, and 84° for bis-C<sub>60</sub> & F-C<sub>60</sub>.

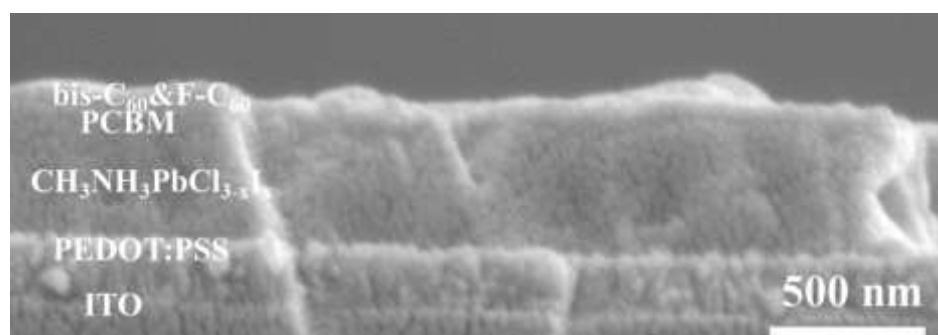

**Figure S2.** Cross-section SEM image of the top-performing PVSC in this study.

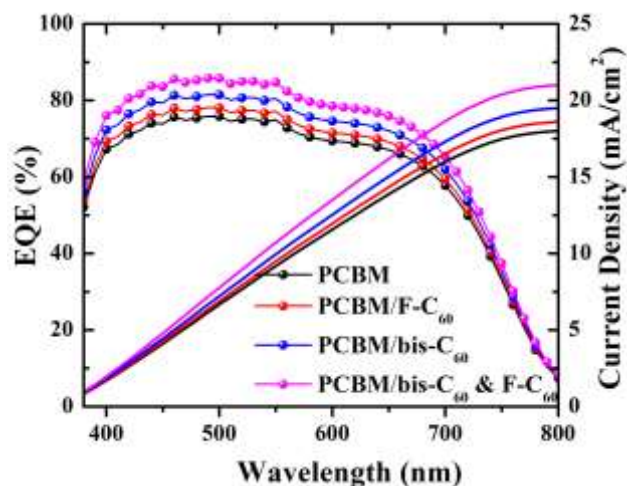

**Figure S3.** The EQE spectra and their integrated photocurrent densities of the IPCE spectra of perovskite solar cells without interlayer (None) and with interlayer ((B)F-C<sub>60</sub>, (C) Bis-C<sub>60</sub>, and (D) Bis-C<sub>60</sub>&F-C<sub>60</sub>)

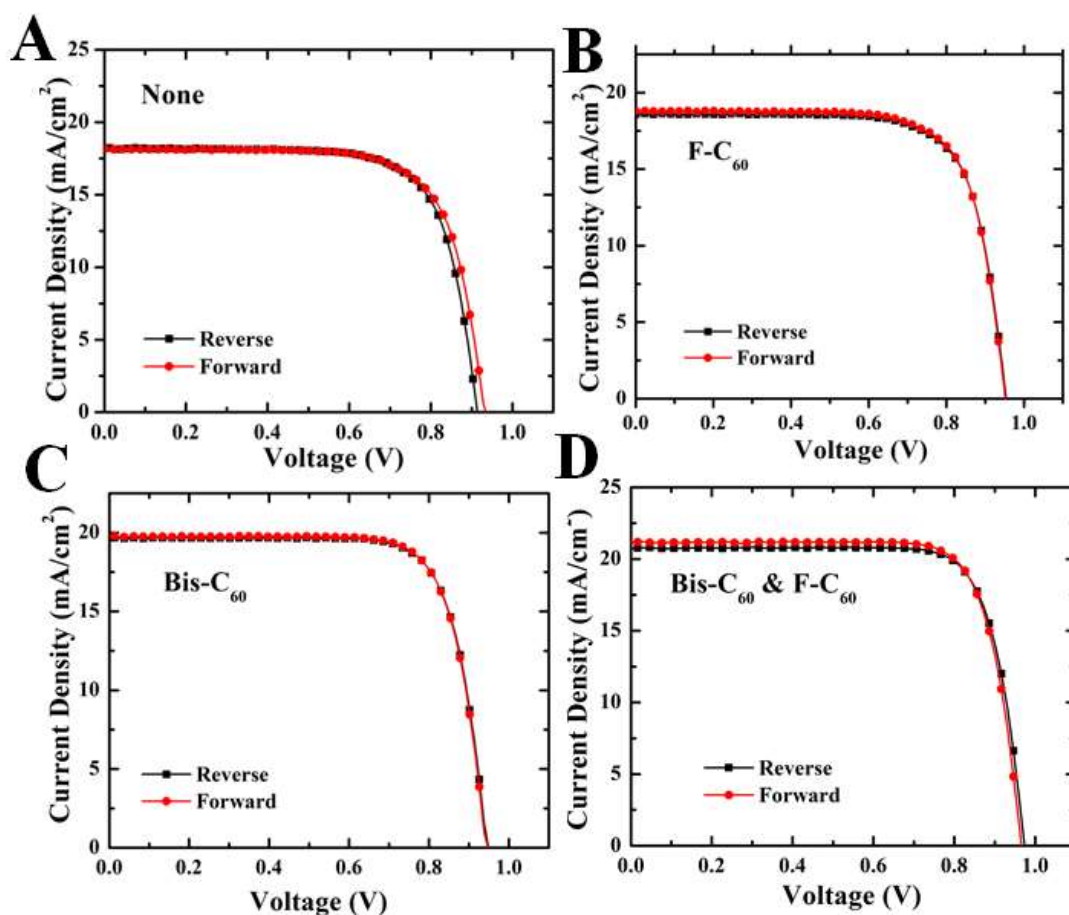

**Figure S4.** J-V curves for (A) without interlayer (None) and with interlayer ((B)F-C<sub>60</sub>, (C) Bis-C<sub>60</sub>, and (D) Bis-C<sub>60</sub>&F-C<sub>60</sub>) which measured by forward (from short circuit to open circuit) and reverse (from open circuit to short circuit) scans. All J-V curves were measured under 100 mW/cm<sup>2</sup> air mass 1.5 global (AM 1.5G) illumination.

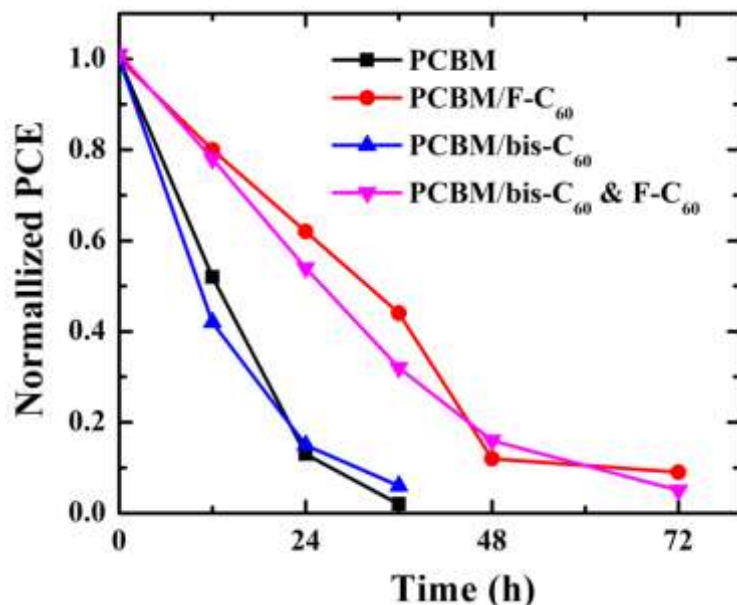

**Figure S5.** Normalized PCE, of PVSCs without and with using the studied FCIs as a function of storage time in ambient condition (air) with a relative humidity of 85 %.

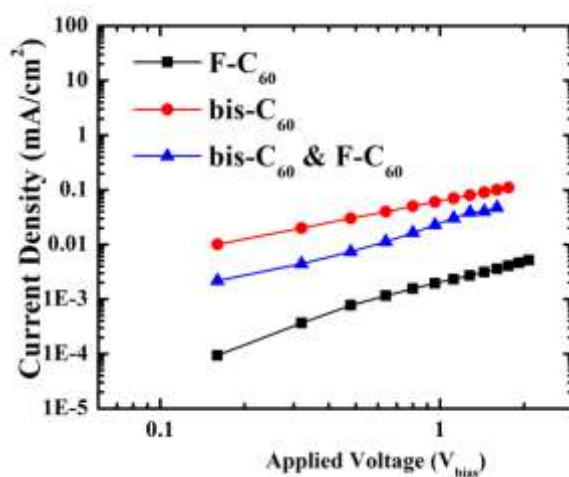

**Figure S6.** Measured space-charge-limited  $J$ - $V$  characteristics of the electron-only devices (ITO/ZnO/fullerene surfactants/LiF/Al) under dark conditions.

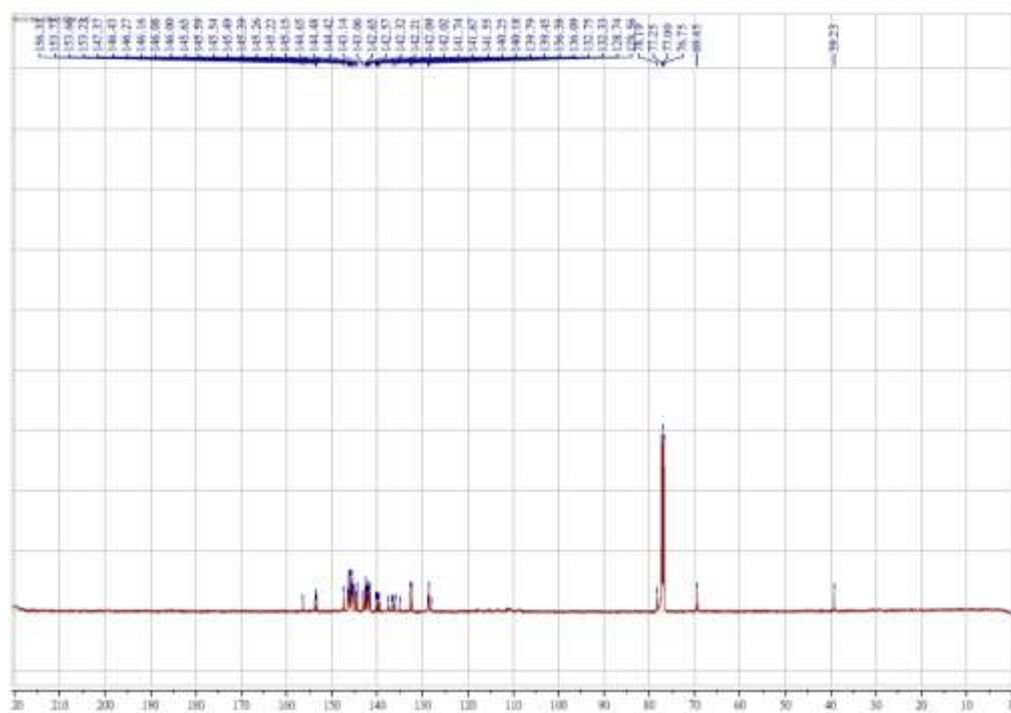

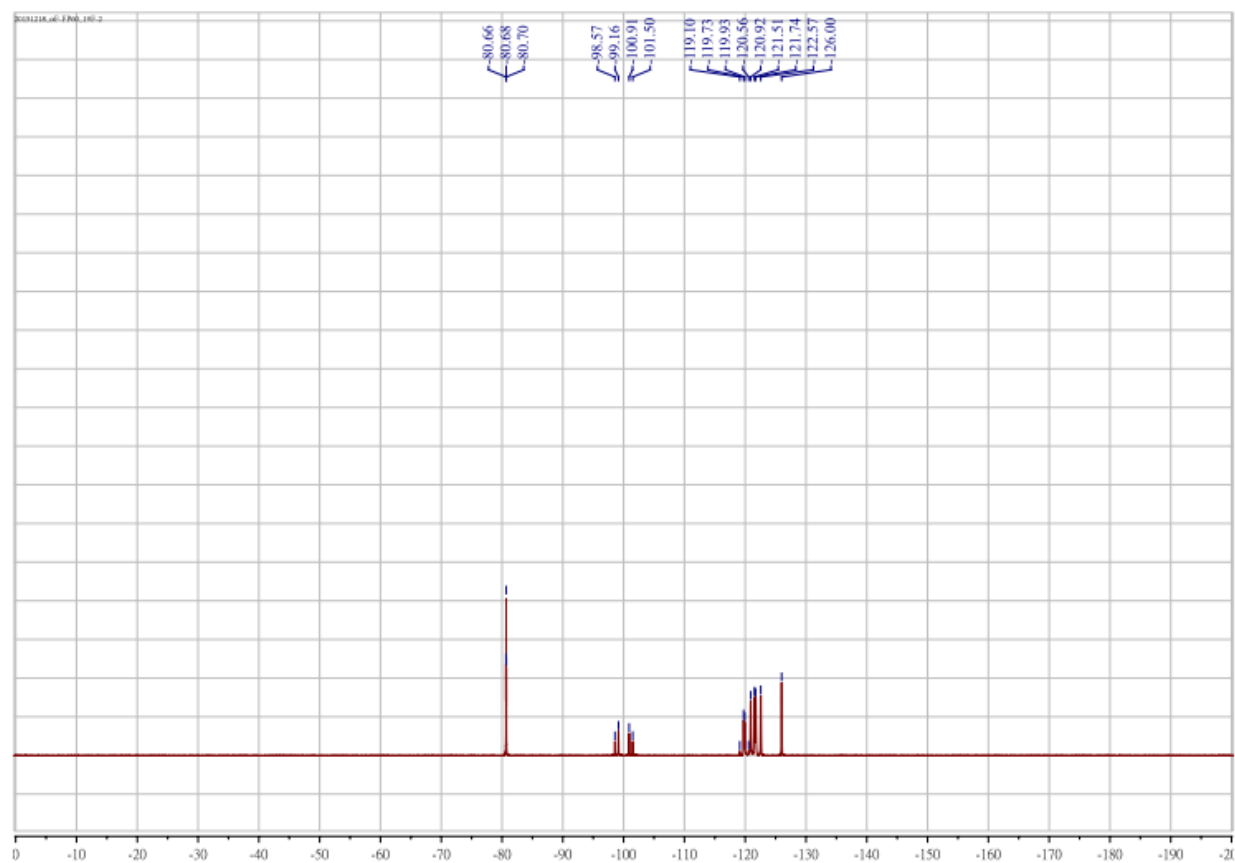

**Figure S9.**  $^{19}\text{F}$  NMR spectrum of F-C<sub>60</sub>.

**Table S1.** The estimated SCLC electron mobility of the fullerene surfactants.

|                                                                             | <b>Bis-C<sub>60</sub></b> | <b>F-C<sub>60</sub></b> | <b>Bis-C<sub>60</sub> &amp; F-C<sub>60</sub></b> |
|-----------------------------------------------------------------------------|---------------------------|-------------------------|--------------------------------------------------|
| Mobility<br>( $\times 10^{-4} \text{ cm}^2 \text{ V}^{-1} \text{ s}^{-1}$ ) | 20.6                      | 3.2                     | 10.7                                             |
| Thickness<br>(nm)                                                           | 100                       | 100                     | 110                                              |
